# Supplementary material for: Electrochemical Oxidation of Low-Concentration Methane on Pt/Pt and Pt/CP under Ambient Conditions
Source: PubMed Central journal article supplement — ACS Omega. 2024 Oct 23;9(44):44549–58. doi: 10.1021/acsomega.4c06665 (PMC11541517; doi:10.1021/acsomega.4c06665), 2024-10-23
Supplement: ao4c06665_si_001.pdf [file ao4c06665_si_001.pdf]

## Supporting Information

Electrochemical oxidation of low concentration methane on Pt/Pt and Pt/CP  
under ambient conditions

Ting Wu<sup>1\*</sup>, David M. Rankin<sup>1</sup>, Vladimir B. Golovko<sup>2,3</sup>

<sup>1</sup>Lincoln Agritech Ltd, Engineering Drive, Lincoln University, Lincoln 7608, New Zealand

<sup>2</sup>School of Physical and Chemical Sciences, University of Canterbury, Christchurch 8140, New Zealand

<sup>3</sup>The MacDiarmid Institute for Advanced Materials and Nanotechnology, Wellington, New Zealand

\*Corresponding author email: [wuting@lincolnagritech.co.nz](mailto:wuting@lincolnagritech.co.nz)

## Table of Contents

|                                                                                                                                                                                                                                                                                                                                                                                                                  |   |
|------------------------------------------------------------------------------------------------------------------------------------------------------------------------------------------------------------------------------------------------------------------------------------------------------------------------------------------------------------------------------------------------------------------|---|
| <b>Figure S1.</b> SEM images of (a) unmodified Pt mesh and (b) carbon paper (scale bars 1 $\mu\text{m}$ ). .....                                                                                                                                                                                                                                                                                                 | 3 |
| <b>Figure S2.</b> XRD pattern of Pt/Pt mesh and Pt/CP, inset is the zoom-in of Pt peaks on CP. ....                                                                                                                                                                                                                                                                                                              | 3 |
| <b>Figure S3.</b> A plot of charge density (q) vs. activation time at $E_{\text{app}} = 0.15$ V for Pt/Pt in $\text{CH}_4$ saturated 0.5 M $\text{HClO}_4$ . .....                                                                                                                                                                                                                                               | 4 |
| <b>Figure S4.</b> (a) Chronoamperometry during $\text{CH}_4$ electrochemical activation (with $\text{N}_2$ background subtracted) recorded at $E_{\text{app}} = 0.15$ V for 1800 s in 0.5 M $\text{HClO}_4$ on Pt/Pt. (b) Chronoamperometry during $\text{CH}_4$ activation ( $\text{N}_2$ background subtracted) recorded at $E_{\text{app}} = 0.3$ V for 1800 s in 0.5 M $\text{HClO}_4$ on Pt/CP. ....        | 4 |
| <b>Figure S5.</b> HPLC result obtained from Pt/CP at $E_{\text{app}} = 0.3$ V for 15 h reaction in $\text{CH}_4$ saturated 0.5 M $\text{HClO}_4$ . .....                                                                                                                                                                                                                                                         | 5 |
| <b>Figure S6.</b> (a) GC results of 1% $\text{CH}_4$ in $\text{N}_2$ electro-oxidation on Pt/Pt before (black line) and after (red line) one cycle of electrochemical oxidation including CA for 30 min at 0.15 V and two CV scans, (b) GC results of 1% $\text{CH}_4$ in $\text{N}_2$ for three cycles of electrochemical oxidation on Pt/Pt. ....                                                              | 5 |
| <b>Figure S7.</b> GC results of $\text{N}_2$ electro-oxidation on Pt/Pt before (black line) and after (red line) one cycle of CA and two CV scans for 30 min at 0.15 V in the absence of $\text{CH}_4$ . .....                                                                                                                                                                                                   | 5 |
| <b>Figure S8.</b> GC results obtained from Pt/CP before (black line) and after (red line) CA at 0.3 V for 30 min and two CV scans for 0.5% $\text{CH}_4$ in $\text{N}_2$ . ....                                                                                                                                                                                                                                  | 6 |
| <b>Figure S9.</b> GC results before $\text{CH}_4$ oxidation (black line) and after (red line) 30 cycles of $\text{CH}_4$ oxidation using 0.5% $\text{CH}_4$ in $\text{N}_2$ with $E_{\text{app}} = 0.3$ V for 30 min CA and two CV scans during each cycle on Pt/CP. ....                                                                                                                                        | 6 |
| <b>Figure S10.</b> (a) CVs of Pt/Pt after 1st cycle (black) and 30 cycles (red), (b) XRD patterns of Pt/Pt as prepared and after 30 CV cycles, (c - d) SEM images (scale bars 10 $\mu\text{m}$ ) of Pt/Pt at scan rate of 50 $\text{mV s}^{-1}$ , as prepared and after 30 cycles of electrochemical activation and oxidation in 0.5 M $\text{HClO}_4$ with 0.5% $\text{CH}_4$ balanced with $\text{N}_2$ . .... | 7 |

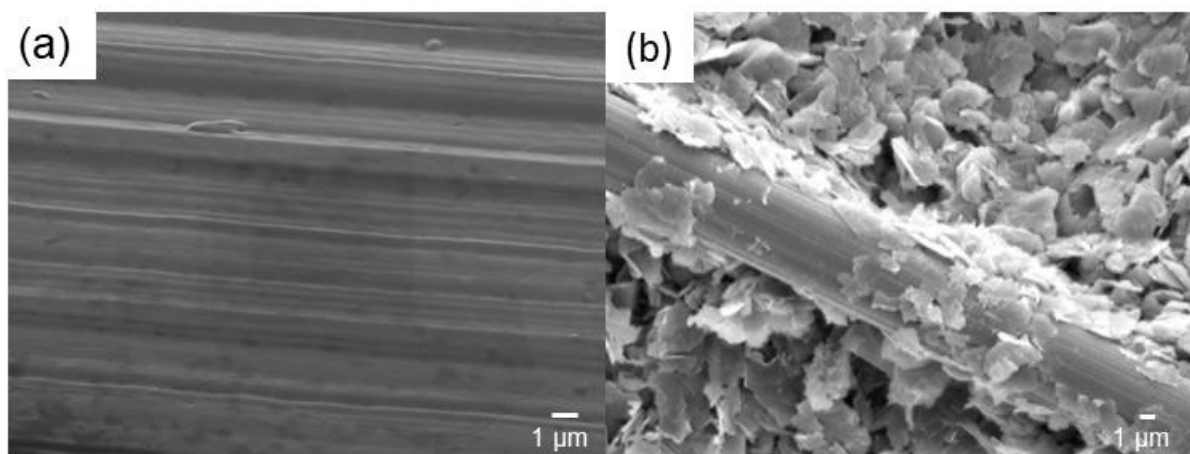

**Figure S1.** SEM images of (a) unmodified Pt mesh and (b) carbon paper (scale bars 1  $\mu\text{m}$ ).

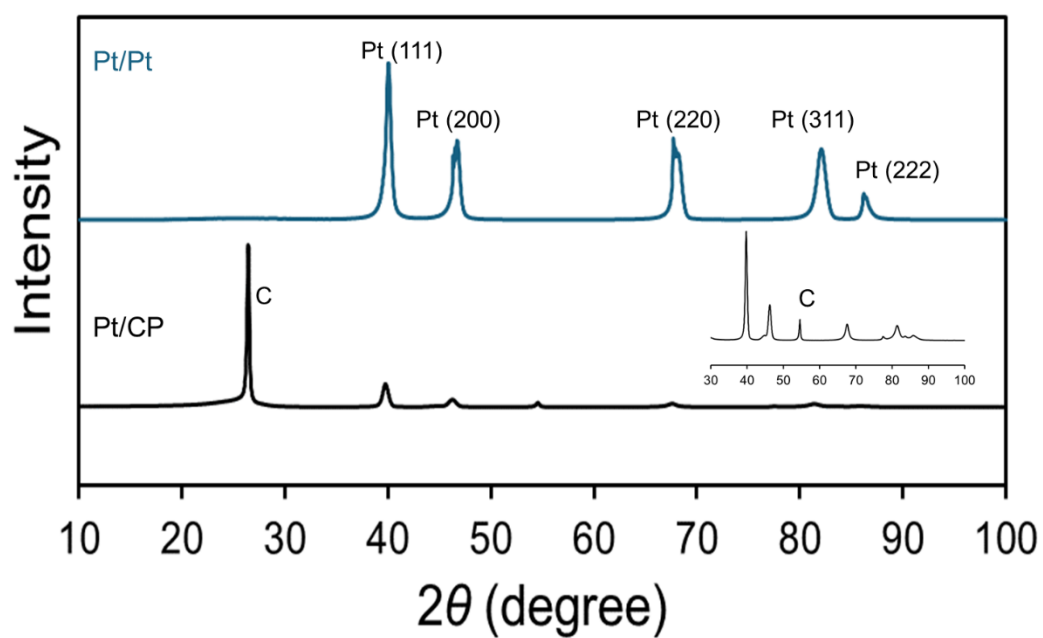

**Figure S2.** XRD pattern of Pt/Pt mesh and Pt/CP, inset is the zoom-in of Pt peaks on CP.

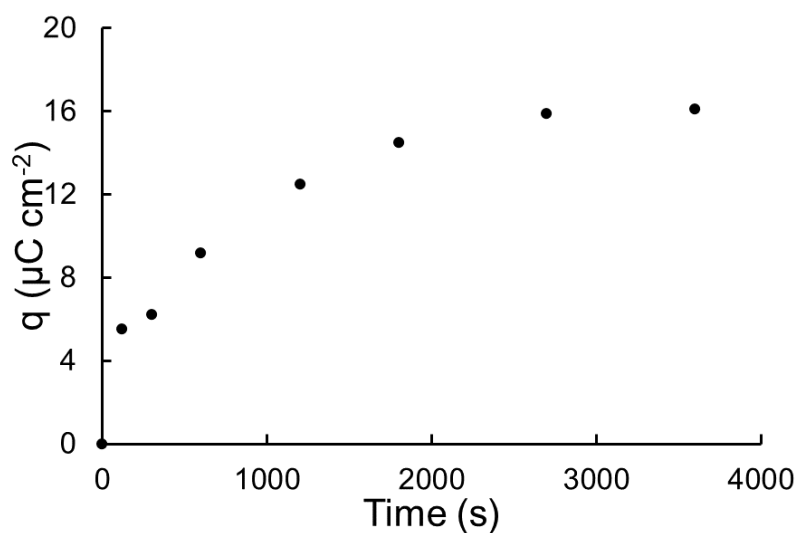

**Figure S3.** A plot of charge density ( $q$ ) vs. activation time at  $E_{app} = 0.15$  V for Pt/Pt in  $CH_4$  saturated 0.5 M  $HClO_4$ .

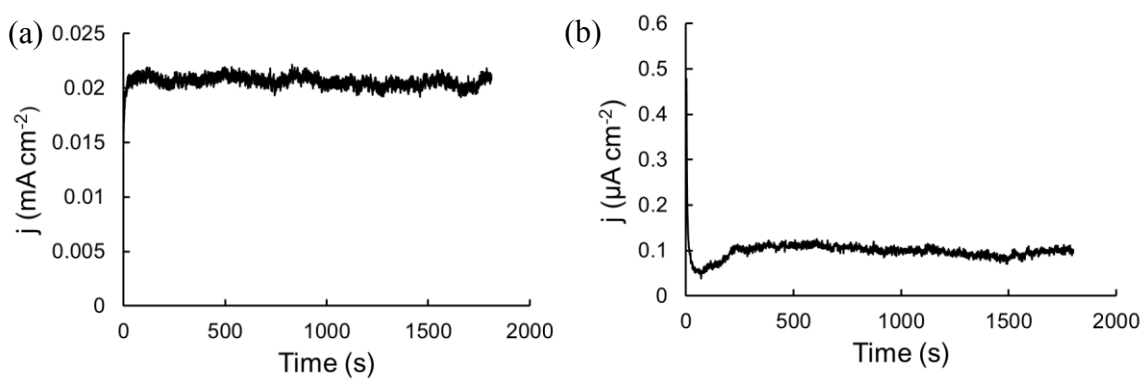

**Figure S4.** (a) Chronoamperometry during  $CH_4$  electrochemical activation (with  $N_2$  background subtracted) recorded at  $E_{app} = 0.15$  V for 1800 s in 0.5 M  $HClO_4$  on Pt/Pt. (b) Chronoamperometry during  $CH_4$  activation ( $N_2$  background subtracted) recorded at  $E_{app} = 0.3$  V for 1800 s in 0.5 M  $HClO_4$  on Pt/CP.

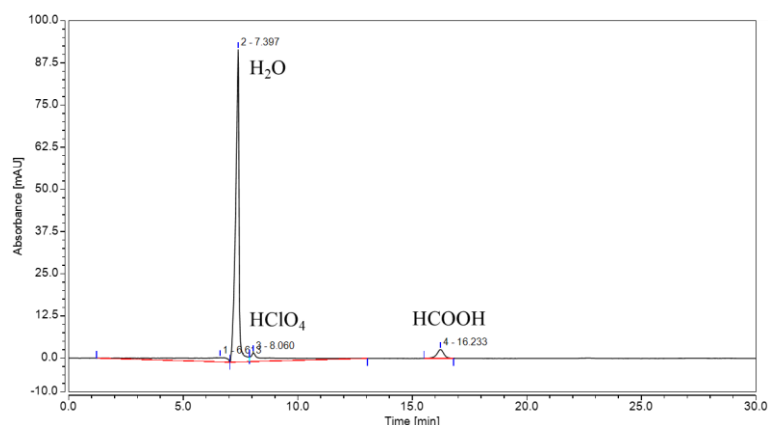

**Figure S5.** HPLC result obtained from Pt/CP at  $E_{app} = 0.3$  V for 15 h reaction in  $\text{CH}_4$  saturated 0.5 M  $\text{HClO}_4$ .

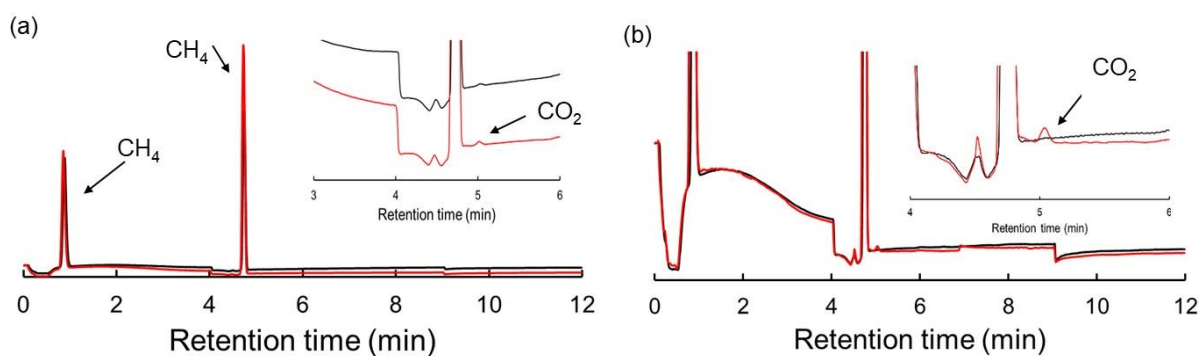

**Figure S6.** (a) GC results of 1%  $\text{CH}_4$  in  $\text{N}_2$  electro-oxidation on Pt/Pt before (black line) and after (red line) one cycle of electrochemical oxidation including CA for 30 min at 0.15 V and two CV scans, (b) GC results of 1%  $\text{CH}_4$  in  $\text{N}_2$  for three cycles of electrochemical oxidation on Pt/Pt.

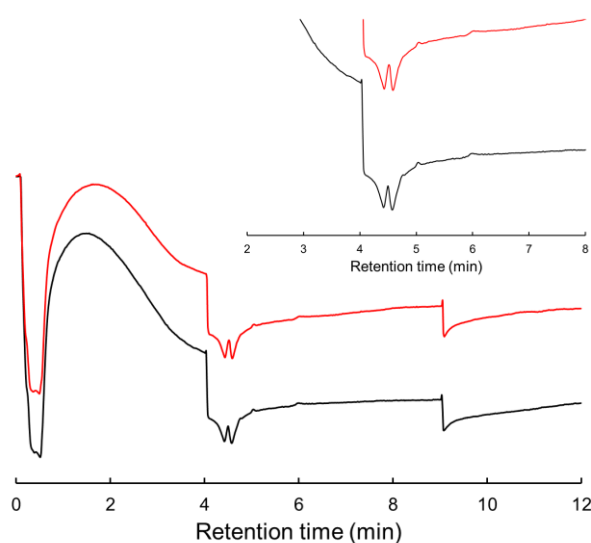

**Figure S7.** GC results of  $\text{N}_2$  electro-oxidation on Pt/Pt before (black line) and after (red line) one cycle of CA and two CV scans for 30 min at 0.15 V in the absence of  $\text{CH}_4$ .

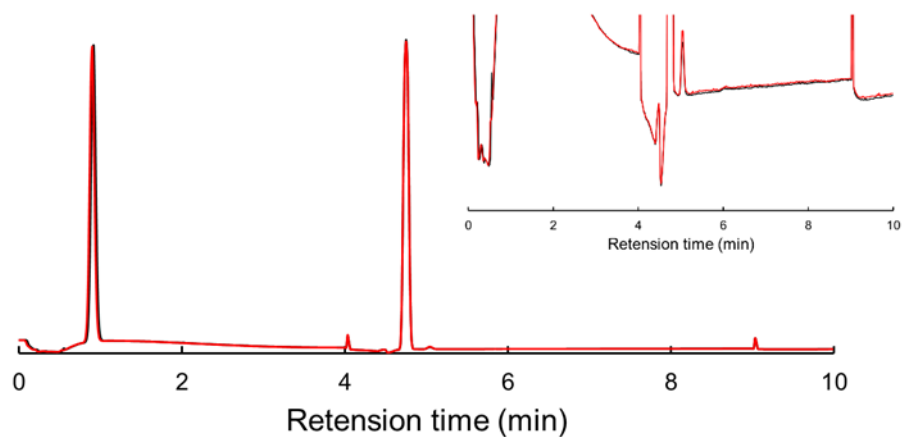

**Figure S8.** GC results obtained from Pt/CP before (black line) and after (red line) CA at 0.3 V for 30 min and two CV scans for 0.5% CH<sub>4</sub> in N<sub>2</sub>.

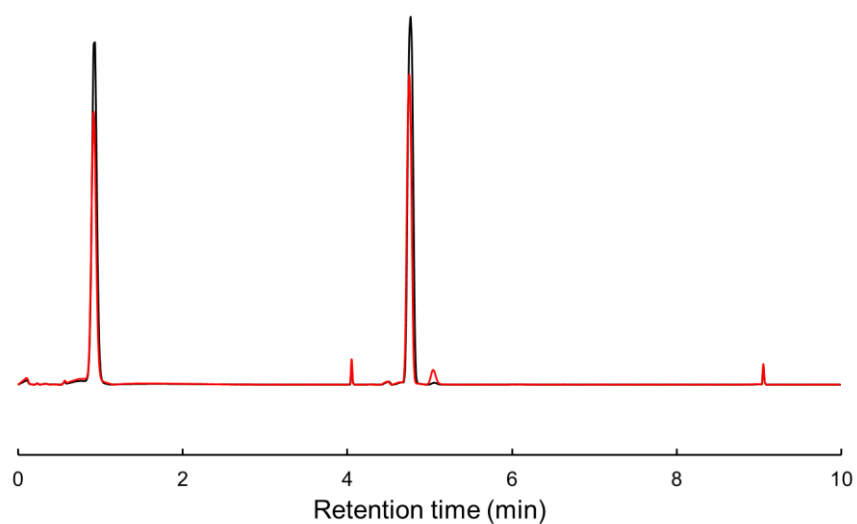

**Figure S9.** GC results before CH<sub>4</sub> oxidation (black line) and after (red line) 30 cycles of CH<sub>4</sub> oxidation using 0.5% CH<sub>4</sub> in N<sub>2</sub> with  $E_{app} = 0.3$  V for 30 min CA and two CV scans during each cycle on Pt/CP.

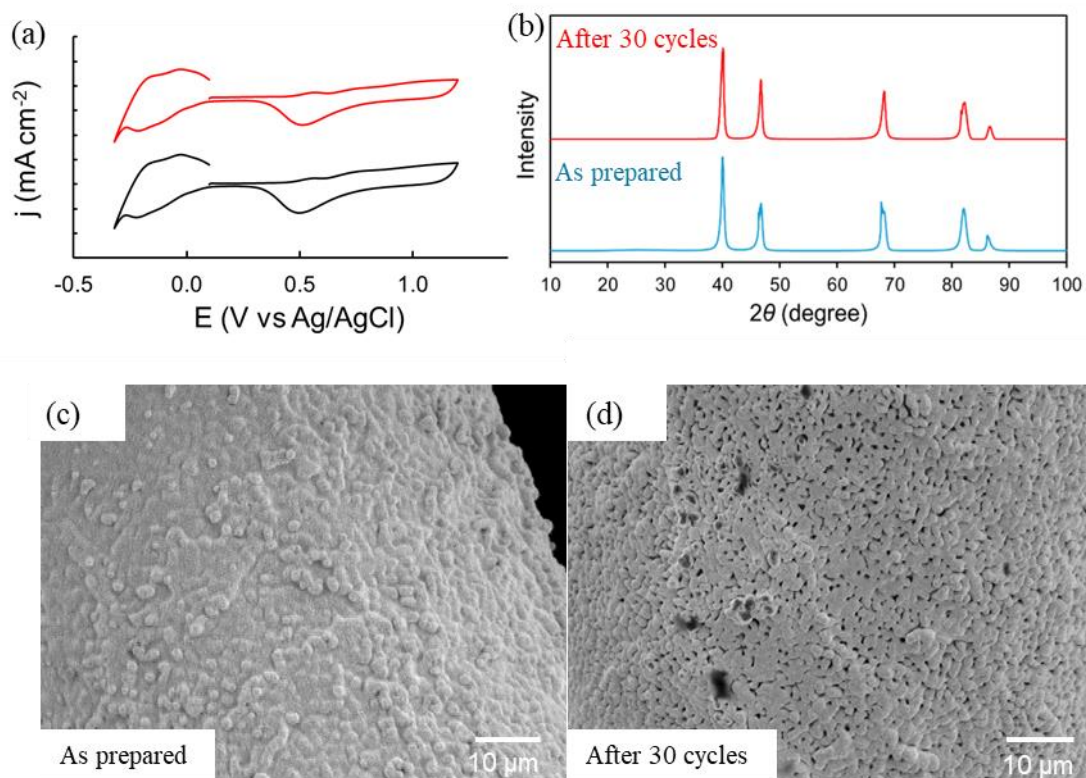

**Figure S10.** (a) CVs of Pt/Pt after 1st cycle (black) and 30 cycles (red), (b) XRD patterns of Pt/Pt as prepared and after 30 CV cycles, (c - d) SEM images (scale bars 10  $\mu$ m) of Pt/Pt at scan rate of 50 mV s<sup>-1</sup>, as prepared and after 30 cycles of electrochemical activation and oxidation in 0.5 M HClO<sub>4</sub> with 0.5% CH<sub>4</sub> balanced with N<sub>2</sub>.
